# Supplementary material
Source: HighWire-hosted journal article supplement (http://jpet.aspetjournals.org/highwire/filestream/155952/field_highwire_adjunct_files/0/1987_supp_figs.pdf)
Supplement: 1987_supp_figs.pdf [file 1987_supp_figs.pdf]

# **Sex differences in the neural and behavioral effects of acute high-dose edible cannabis consumption in rats**

Richard QUANSAH AMISSAH, Hakan KAYIR, Malik Asfandyaar TALHAT, Ahmad HASSAN, Yu GU, Ron JOHNSON, Karolina URBAN, Jibrán Y. KHOKHAR

Department of Biomedical Sciences, Ontario Veterinary College, University of Guelph, Guelph, Ontario, Canada (RQA, HK, MAT, AH, YG, RJ, JYK); Avicanna Inc., Toronto, Canada (KU); Department of Anatomy and Cell Biology, Schulich School of Medicine and Dentistry, Western University, London, Ontario, Canada (JYK).

Running Title: Sex differences in high-dose edible cannabis consumption effects

Corresponding Author: Jibrán Y. KHOKHAR

Address: Department of Anatomy and Cell Biology, Schulich School of Medicine and Dentistry, Medical Sciences Building 472, Western University, London, Ontario, Canada

Email: [jkhokha@uwo.ca](mailto:jkhokha@uwo.ca)

Tel.: 519-661-2111 Ext. 86815

Fax: 519-685-8616

## Supplementary Information

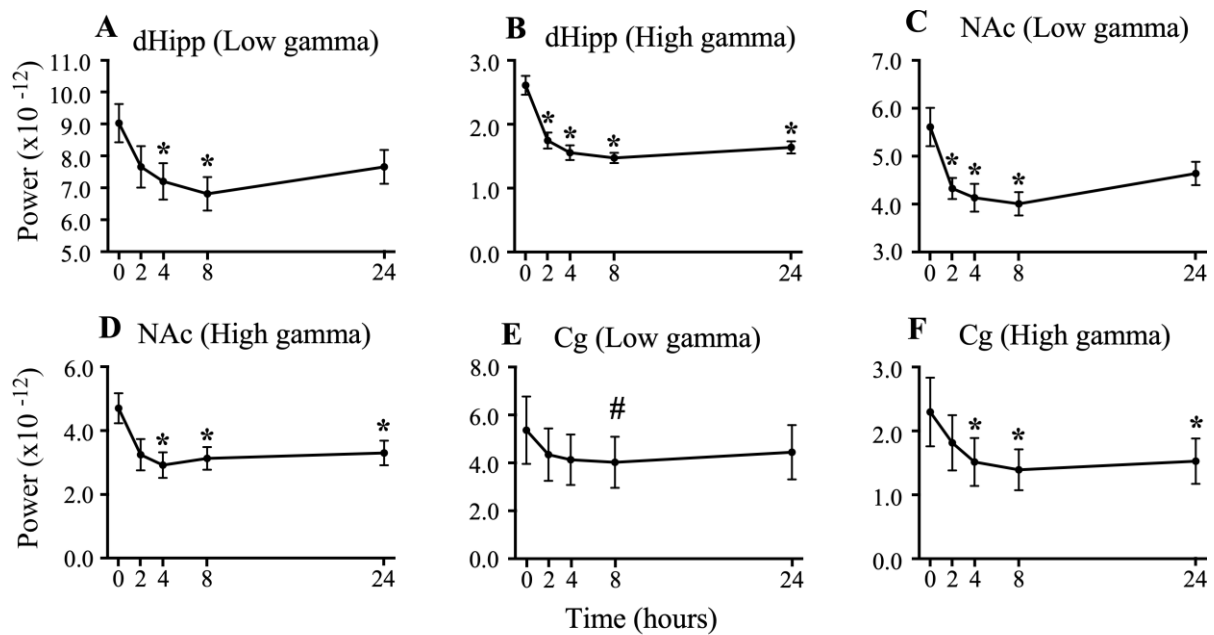

**Fig. S1**

**S1 Fig. Comparison of low and high gamma power at other time points with baseline in male rats using one-way repeated measures analysis of variance.** A and B. Graphs comparing low and high gamma power spectral densities, respectively, in the dorsal hippocampus (dHipp) at the 2, 4, 8, and 24-h time-points with that at baseline. C and D. Graphs comparing low and high gamma power spectral densities, respectively, in the cingulate cortex (Cg) at the 2, 4, 8, and 24-h time-points with that at baseline. D and E. Graphs comparing low and high gamma power spectral densities, respectively, in the nucleus accumbens (NAc) at the 2, 4, 8, and 24-h time-points with that at baseline. \*: significantly different compared to baseline, #: tending towards significance compared to baseline.

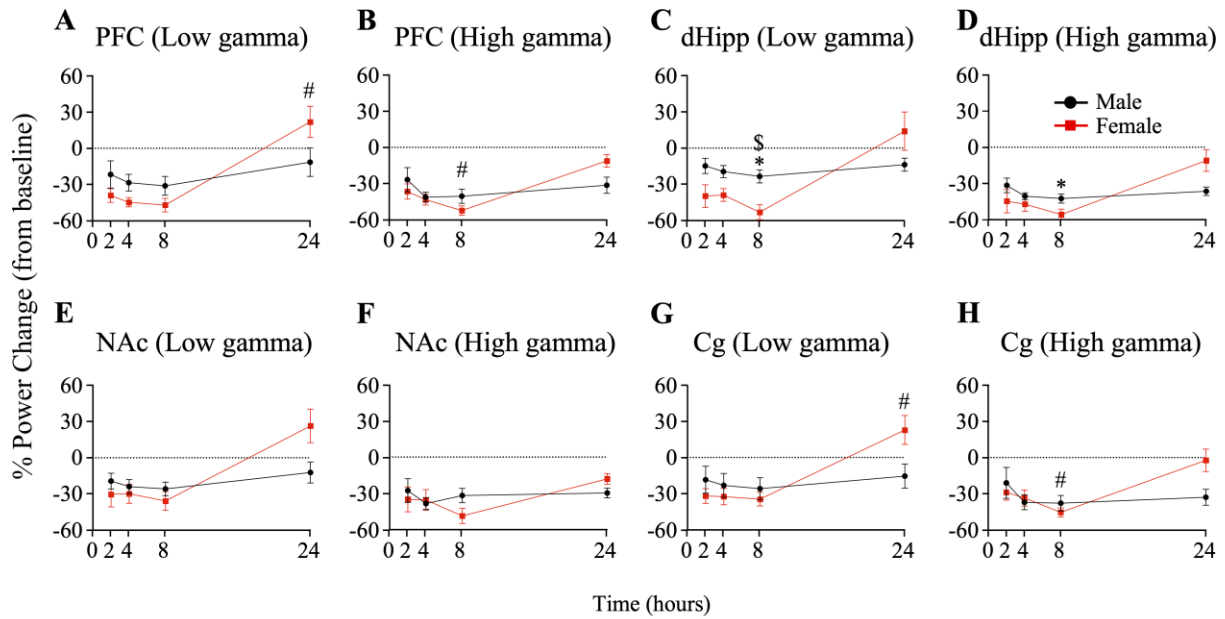

**Fig. S2**

**S2 Fig. Power spectral density (PSD) plotted as percentage change from baseline for male and female rats after acute high-dose edible cannabis consumption.** A and B. Low and high gamma power percentage change, respectively, in the PFC between males and females at different time-points. C and D. Low and high gamma power percentage change, respectively, in the dorsal hippocampus (dHipp) of males and female rats at different time-points. E and F. Low and high gamma power percentage change, respectively, in the nucleus accumbens (NAc) of males and female rats at different time-points. G and H. Low and high gamma power percentage change, respectively, in the cingulate cortex (Cg) between males and females at different time-points. \$: comparison of time-points between sexes with  $p < 0.05$ , \*: comparison of power at other time-points with that at the 2-h time-point in males with  $p < 0.05$ , #: comparison of power at other time-points with that at the 2-h time-point in females with  $p < 0.05$ .

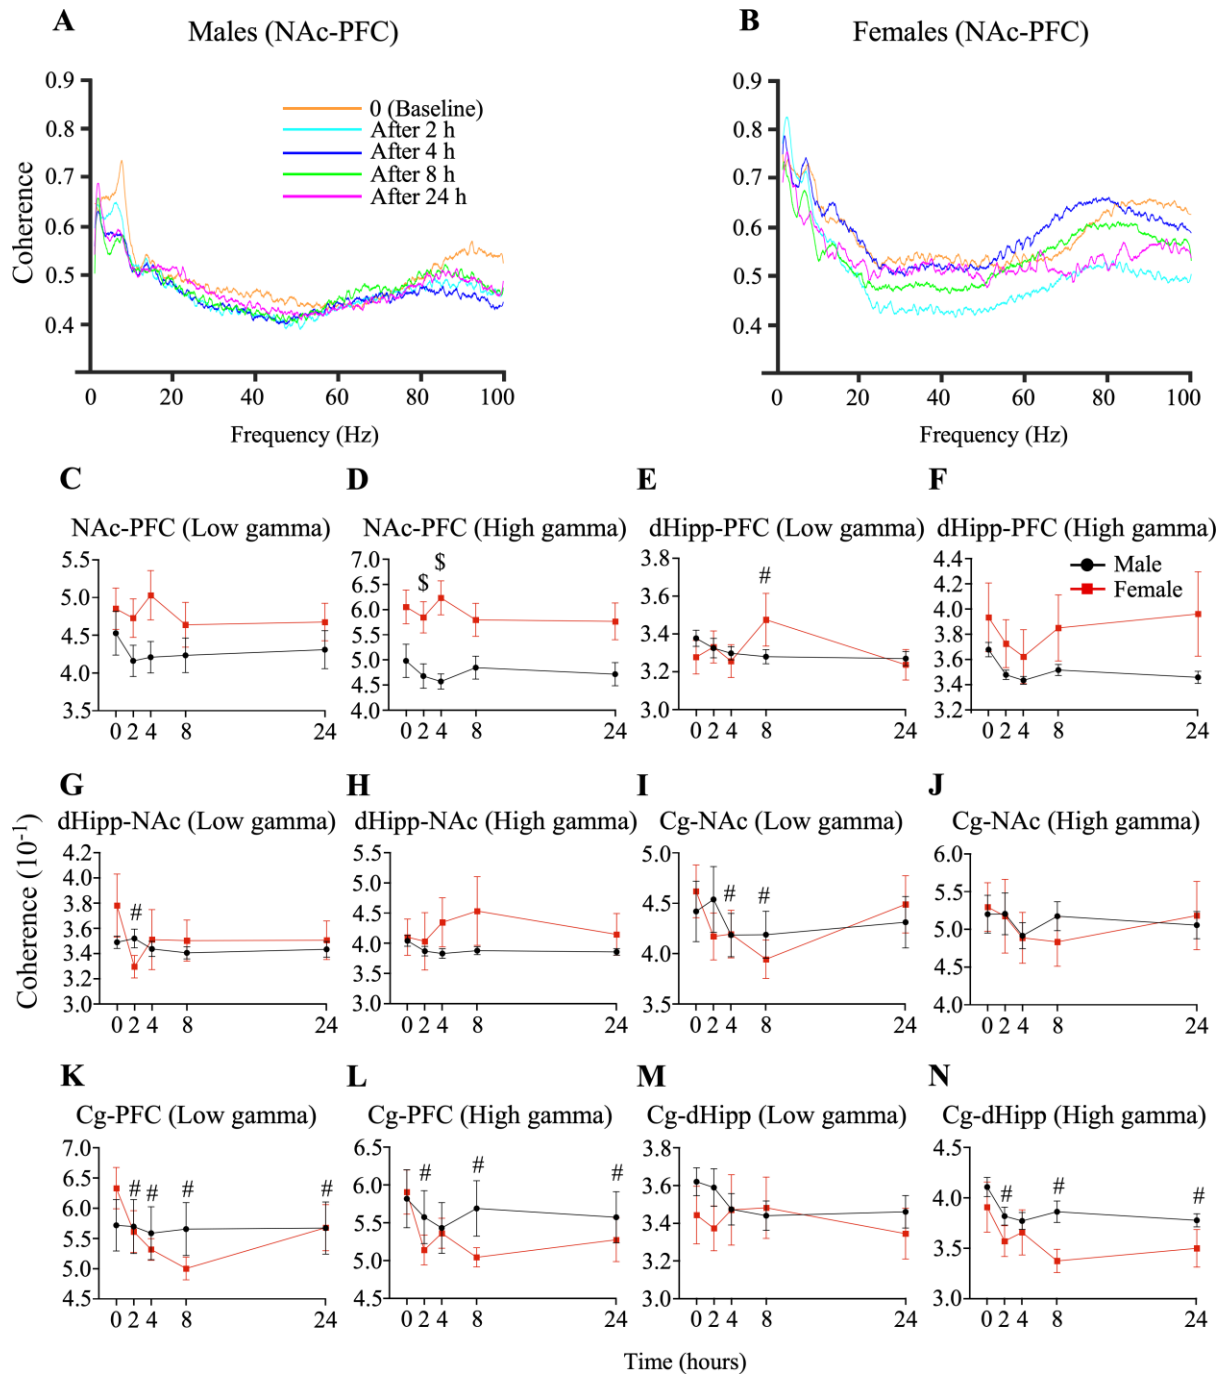

**Fig. S3**

**S3 Fig. Coherence plots for male and female rats after acute high-dose edible cannabis consumption.** Representative coherence plots for male rats (A) and female rats (B) showing the coherence between the nucleus accumbens and prefrontal cortex (NAc-PFC) for each time-point of interest. Orange plot: Baseline, cyan plot: 2-h time-point, blue plot: 4-h time-point, green plot: 8-h time-point, and pink plot: 24-h time-point. C. Graph comparing NAc-

PFC low gamma coherence between male and female rats at different time-points. D. Graph comparing NAc-PFC high gamma coherence between male and female rats at different time-points. E. Graph comparing dorsal hippocampus and prefrontal cortex (dHipp-PFC) low gamma coherence between male and female rats at different time-points. F. Graph comparing dHipp-PFC high gamma coherence between male and female rats at different time-points. G. Graph comparing dorsal hippocampus and nucleus accumbens (dHipp-NAc) low gamma coherence between male and female rats at different time-points. H. Graph comparing dHipp-NAc high gamma coherence between male and female rats at different time-points I. Graph comparing cingulate cortex and nucleus accumbens (Cg-NAc) low gamma coherence between male and female rats at different time-points. J. Graph comparing Cg-NAc high gamma coherence between male and female rats at different time-points. K. Graph comparing cingulate cortex and prefrontal cortex (Cg-PFC) low gamma coherence between male and female rats at different time-points. L. Graph comparing Cg-PFC high gamma coherence between male and female rats at different time-points. M. Graph comparing cingulate cortex and dorsal hippocampus (Cg-dHipp) low gamma coherence between male and female rats at different time-points. N. Graph comparing Cg-dHipp high gamma coherence between male and female rats at different time-points. \$: comparison of different time-points between sexes, #: comparison of other time-points with baseline in female rats.

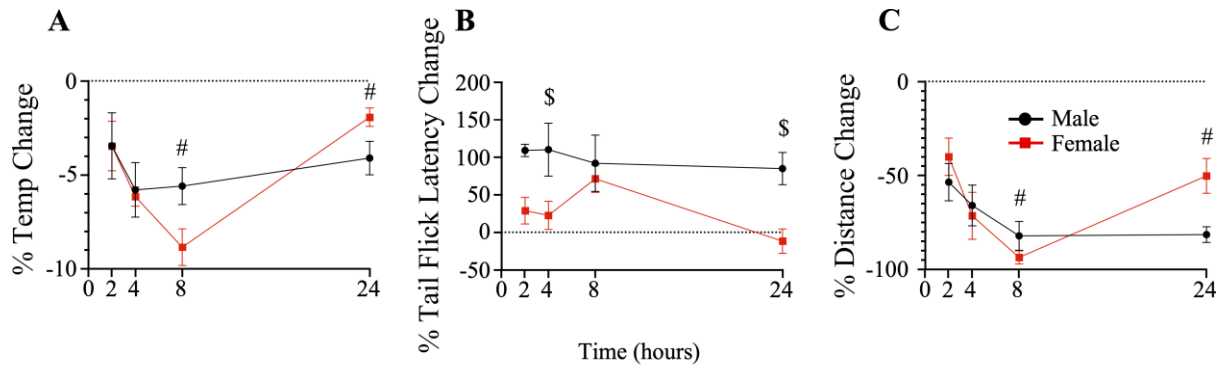

Fig. S4

**S4 Fig. Acute edible cannabis-induced effects on body temperature, anti-nociception, and locomotion percentage change in male and female rats.** A. Percentage change in rectal temperatures of males and females measured following acute high-dose edible cannabis consumption. B. Percentage change in latency to tail flick of males and females at the time-points of interest following acute high-dose edible cannabis consumption. C. Percentage change in total distance traveled by males and females in the open field box at the time-points of interest following acute high-dose edible cannabis consumption. \$: comparison of outcome at different time-points between sexes with  $p < 0.05$ , \*: comparison of outcome at other time-points with that at the 2-h time-point in males with  $p < 0.05$ , #: comparison of outcome at other time-points with that at the 2-h time-point in females with  $p < 0.05$ .

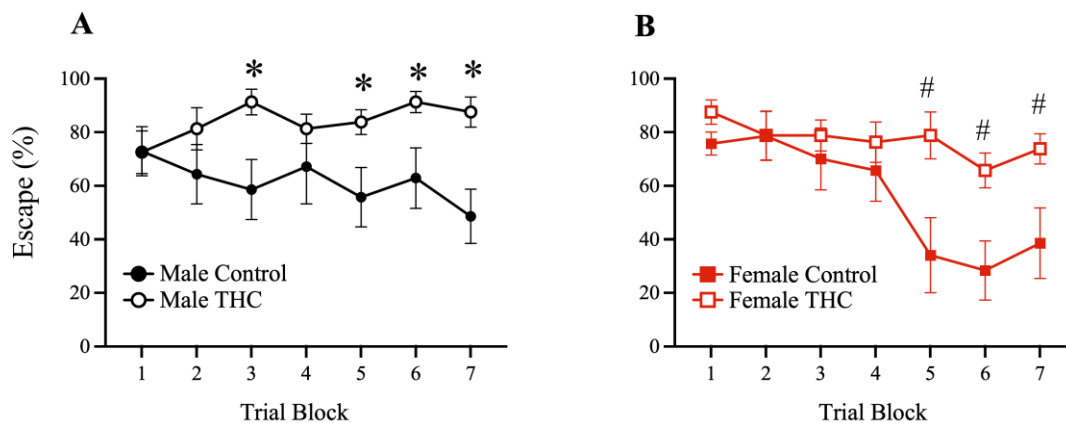

Fig. S5

**S5 Fig. Active avoidance is disrupted by acute high-dose edible cannabis consumption.**

A. Graph comparing the percentage escape among male control and THC rats. Filled black circle: male control rats, empty black circle: male THC rats. B. Graph comparing the percentage escape among female control and THC rats. Filled red square: female control rats, empty red square: female THC rats. \*: comparison of percentage avoidance for different trials between male control rats and male THC rats with  $p < 0.05$ , #: comparison of percentage avoidance for different trials between female control rats and female THC rats with  $p < 0.05$ .

**Rat Equivalent Dose Calculation**

We assumed a situation where a child with an average weight of 20 kg, consumes an entire pack of cannabis edibles containing 100 mg THC. This will lead to a human equivalent dose of 5 mg/kg. To calculate the animal (rat) equivalent dose, we used the formula below (Reagan-Shaw, Nihal, and Ahmad 2008):

$$\text{Animal equivalent dose} = \frac{\text{human equivalent dose}}{\frac{\text{animal } k_m \text{ factor}}{\text{human } k_m \text{ factor}}}$$

$$\text{where } k_m = \frac{\text{body weight}}{\text{body surface area}}$$

$k_m$  factor (6-year-old child)  $\approx 25$ ,  $k_m$  factor (rats, 150 g) = 6.

$$\text{Using this formula, the animal equivalent dose} = \frac{5}{6/25} = \frac{5}{0.24} = 20.83 \text{ mg/kg}$$

References

Reagan-Shaw, S., M. Nihal, and N. Ahmad. 2008. 'Dose translation from animal to human studies revisited', *Faseb j*, 22: 659-61.
